# Supplementary material for: COMPUTER-BASED COMMUNICATION SYSTEM FOR NUCLEAR POWER PLANTS.
Source: Royal Society of Chemistry journal article supplement (doi:10.1039/d0ra02495c), 1972-01-01
Supplement: d0ra02495c1.pdf [file d0ra02495c1.pdf]

Electronic Supplementary Material (ESI) for RSC Advances.

This journal is © the Owner Societies 2020

### Acquiring effective CaO-based CO<sub>2</sub> sorbent and achieving selective methanation of CO<sub>2</sub>

Chao Ping, Bao-Qi Feng, Yun-Lei Teng,\* Han-Qing Chen, Si-Li Liu, Yun-Long Tai, Hao-Nan Liu and Bao-Xia Dong\*

School of Chemistry and Chemical Engineering, Yangzhou University, Yangzhou, 225002, P. R. China.

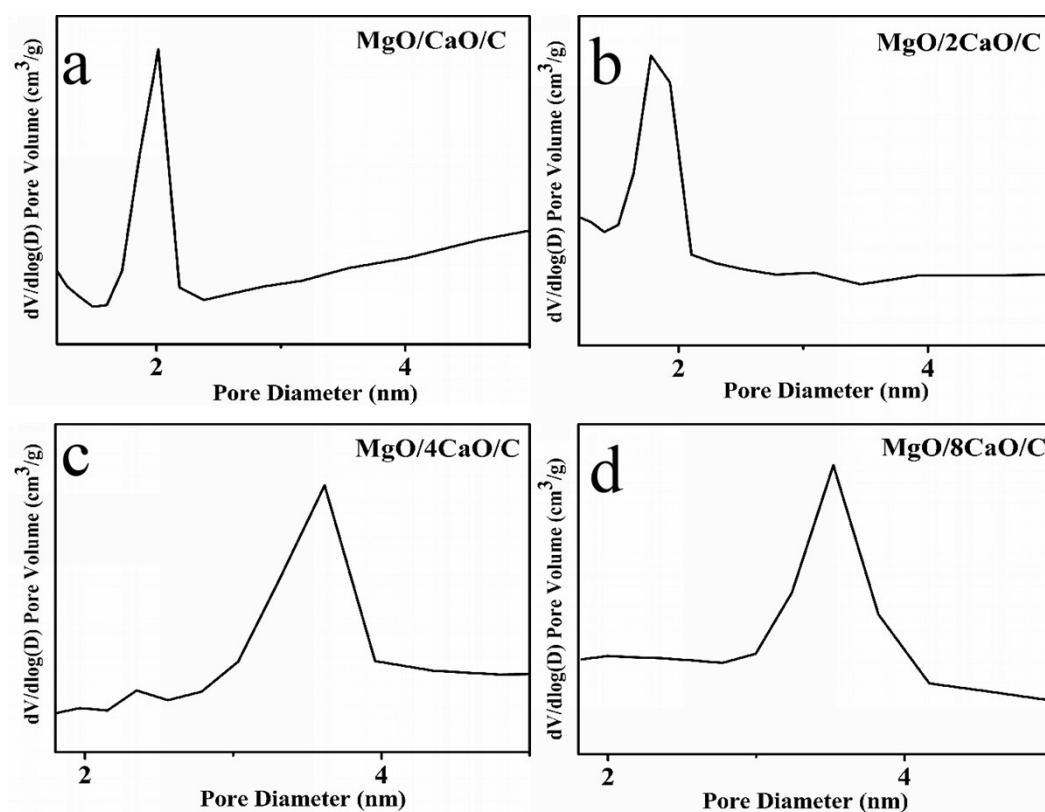

**Fig. S1.** Pore size distributions of (a) MgO/CaO/C; (b) MgO/2CaO/C; (c) MgO/4CaO/C; (d) MgO/8CaO/C sorbents.

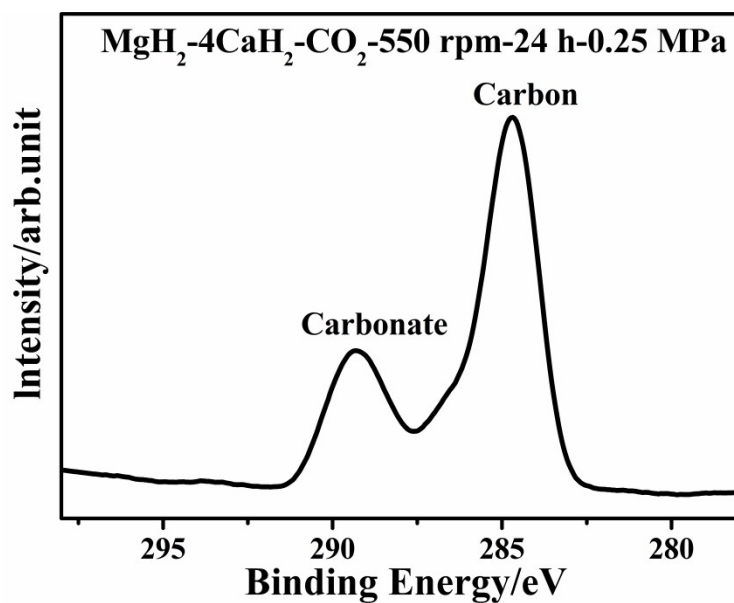

**Fig. S2.** Carbon XPS spectrum of the solid products formed in the reaction of MgH<sub>2</sub>/CaH<sub>2</sub> mixture with CO<sub>2</sub>.

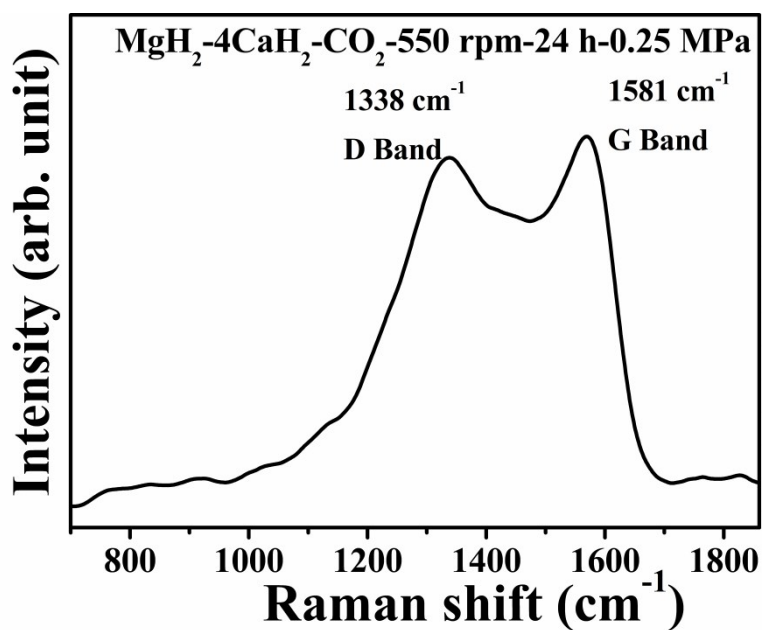

**Fig. S3.** Raman spectrum of amorphous carbon formed in the reaction of MgH<sub>2</sub>/CaH<sub>2</sub> mixture with CO<sub>2</sub>.

### Calculation of the molar amount of amorphous carbon in the samples:

The following equations are used to calculate the mole amount of carbon in the  $\text{MaO}@x\text{CaO}@C$  ( $x = 1, 2, 4, \text{ and } 8$ ) samples formed in the reaction of  $\text{MgH}_2/\text{CaH}_2$  mixture with  $\text{CO}_2$ :

$$S = 1356.1184 \cdot P_{\text{CH}_4} + 42101.053 \quad (\text{S1})$$

$$P_{\text{CH}_4} V = n_{\text{CH}_4} RT \quad (\text{S2})$$

$$n_{\text{C}} = n_{\text{CO}_2} - n_{\text{CH}_4} \quad (\text{S3})$$

In Eqs. (S1-S3),  $S$  is the peak area measured by GC.  $P_{\text{CH}_4}$  is the partial pressure of  $\text{CH}_4$ ,  $V$  is the volume of the stainless steel milling vessel,  $n_{\text{CH}_4}$  is the mole amount of  $\text{CH}_4$  produced,  $R$  is the ideal gas constant,  $T$  represents room temperature (298 K),  $n_{\text{C}}$  is the mole amount of C produced,  $n_{\text{CO}_2}$  is the mole amount of  $\text{CO}_2$  used.
